# Supplementary material
Source: HighWire-hosted journal article supplement (http://cmajopen.ca/highwire/filestream/85270/field_highwire_adjunct_files/2/CMAJOpen-2020-0166-1-at.pdf)
Supplement: CMAJOpen-2020-0166-1-at.pdf [file CMAJOpen-2020-0166-1-at.pdf]

## Appendix 1A. Codes and definitions used to define study cohort

### Breast Cancer cases

Diagnosis of histologically confirmed invasive (*behaviour*=3, ICD-O) breast cancer between Jan 1st, 2007 and Dec 31st, 2011 from the OCR using dxcode= 174.0 to 174.9 (ICD-9)

**Stage:** Using 'best stage' from Ontario Cancer Registry (OCR) to assign TNM 6<sup>th</sup> edition stage I, II, III, IV

### Components of treatment-related variables

#### Lumpectomy

- From CIHI (DAD and SDS) databases, find **all** the lumpectomy procedures (Canadian Classification of Health Interventions (CCI) codes are: 1YM87^^, 1YM88^^, 1YK87^^, 1YK89^^, 1YL87LA, 1YL89LA) from -2weeks to +9 months within the date of diagnosis

|            |                                                                                                                           |
|------------|---------------------------------------------------------------------------------------------------------------------------|
| 1YM87DA    | Excision partial, breast using endoscopic approach with simple apposition                                                 |
| 1YM87GB    | Excision partial, breast using endoscopic guide wire (or needle hook) excision technique with simple apposition of tissue |
| 1YM87LA    | Excision partial, breast using open approach with simple apposition of tissue (e.g. suturing)                             |
| 1YM87LAXXA | Excision partial, breast using open approach and full thickness autograft to close defect                                 |
| 1YM87UT    | Excision partial, breast using open guide wire (or needle hook) excision technique and simple apposition of tissue        |
| 1YM88LAPM  | Excision partial with reconstruction, breast without tissue with implantation of prosthesis                               |
| 1YM88LAPME | Excision partial with reconstruction, breast with local flap with implantation of prosthesis                              |
| 1YM88LAPMF | Excision partial with reconstruction, breast using free flap with implantation of prosthesis                              |
| 1YM88LAPMG | Excision partial with reconstruction, breast using distant pedicled flap with implantation of prosthesis                  |
| 1YM88LAQF  | Excision partial with reconstruction, breast without tissue with implantation of prosthesis and expander                  |
| 1YM88LAQFE | Excision partial with reconstruction, breast with local flap with implantation of prosthesis and expander                 |
| 1YM88LAQFF | Excision partial with reconstruction, breast using free flap with implantation of prosthesis and expander                 |
| 1YM88LAQFG | Excision partial with reconstruction, breast using distant pedicled flap with implantation of prosthesis and expander     |
| 1YM88LATP  | Excision partial with reconstruction, breast without tissue with implantation of tissue expander                          |
| 1YM88LATPE | Excision partial with reconstruction, breast with local flap with tissue expander                                         |
| 1YM88LATPF | Excision partial with reconstruction, breast using free flap with implantation of tissue expander                         |
| 1YM88LATPG | Excision partial with reconstruction, breast using distant pedicled flap with implantation of tissue expander             |
| 1YM88LAXXE | Excision partial with reconstruction, breast using local flap with no implanted device                                    |
| 1YM88LAXXF | Excision partial with reconstruction, breast using free flap with no implanted device                                     |
| 1YM88LAXXG | Excision partial with reconstruction, breast using distant pedicled flap with no implanted device                         |
| 1YK87LA    | Excision partial, nipple using open excisional approach                                                                   |
| 1YK87LAXXA | Excision partial, nipple using open excisional approach and full thickness autograft                                      |
| 1YK87LAXXB | Excision partial, nipple using open excisional approach and split thickness autograft                                     |

1YK87LAXXE    Excision partial, nipple using open excisional approach and local flap for closure  
 1YK89LA        Excision total, nipple using open approach  
 1YK89LAXXA    Excision total, nipple using open approach and full thickness autograft  
 1YK89LAXXE    Excision total, nipple using open approach and local flap  
 1YL87LA        Excision partial, lactiferous duct using open approach  
 1YL89LA        Excision total, lactiferous duct using open approach

## Mastectomy

- From CIHI (DAD and SDS) databases, find **all** the mastectomy procedures (CCI codes are: 1YM89^^, 1YM90^^, 1YM91^^, 1YM92^^) from -2weeks to +9 months within the date of diagnosis

1YM89LA        Excision total, breast without tissue repair  
 1YM89LAXXA    Excision total, breast with full thickness autograft  
 1YM90LAPM     Excision total with reconstruction, breast simple mastectomy with no node dissection without tissue with implantation of breast prosthesis  
 1YM90LAPME    Excision total with reconstruction, breast simple mastectomy with no node dissection using local flap with implantation of breast prosthesis  
 1YM90LAPMF    Excision total with reconstruction, breast simple mastectomy with no node dissection using free flap (2) with implantation of breast prosthesis  
 1YM90LAPMG    Excision total with reconstruction, breast simple mastectomy with no node dissection using distant pedicled flap(1) with implantation of breast prosthesis  
 1YM90LAQF     Excision total with reconstruction, breast simple mastectomy with no node dissection without tissue with implantation of prosthesis and expander  
 1YM90LAQFE    Excision total with reconstruction, breast simple mastectomy with no node dissection using local flap with implantation of prosthesis and expander  
 1YM90LAQFF    Excision total with reconstruction, breast simple mastectomy with no node dissection using free flap (2) with implantation of prosthesis and expander  
 1YM90LAQFG    Excision total with reconstruction, breast simple mastectomy with no node dissection using distant pedicled flap(1) with implantation of prosthesis and expander  
 1YM90LATP     Excision total with reconstruction, breast simple mastectomy with no node dissection without tissue with implantation of tissue expander  
 1YM90LATPF    Excision total with reconstruction, breast simple mastectomy with no node dissection using free flap (2) with implantation of tissue expander  
 1YM90LATPG    Excision total with reconstruction, breast simple mastectomy with no node dissection using distant pedicled flap(1) with implantation of tissue expander  
 1YM90LAXXE    Excision total with reconstruction, breast simple mastectomy with no node dissection using local flap with no implanted device  
 1YM90LAXXF    Excision total with reconstruction, breast simple mastectomy with no node dissection using free flap (2) with no implanted device  
 1YM90LAXXG    Excision total with reconstruction, breast simple mastectomy with no node dissection using distant pedicled flap(1) with no implanted device  
 1YM91LA        Excision (modified) radical, breast without tissue  
 1YM91LATP     Excision (modified) radical, breast with implantation of tissue expander  
 1YM91LAXXA    Excision radical (modified), breast using full thickness autograft  
 1YM91LAXXE    Excision (modified) radical, breast using local flap  
 1YM91TR        Excision extended radical, breast without tissue  
 1YM91TRXXA    Excision extended radical, breast using full thickness autograft

|            |                                                                                                                                  |
|------------|----------------------------------------------------------------------------------------------------------------------------------|
| 1YM91TRXXE | Excision extended radical, breast using local flap                                                                               |
| 1YM91WP    | Excision super radical, breast without tissue                                                                                    |
| 1YM91WPXXA | Excision super radical, breast using full thickness autograft                                                                    |
| 1YM91WPXXE | Excision super radical, breast using local flap                                                                                  |
| 1YM92LAPME | Excision (modified) radical with reconstruction, breast using local flap with implantation of breast prosthesis                  |
| 1YM92LAPMF | Excision (modified) radical with reconstruction, breast using free flap with implantation of breast prosthesis                   |
| 1YM92LAPMG | Excision (modified) radical with reconstruction, breast using distant pedicled flap with implantation of breast prosthesis       |
| 1YM92LAQFE | Excision (modified) radical with reconstruction, breast using local flap with implantation of prosthesis and expander            |
| 1YM92LAQFF | Excision (modified) radical with reconstruction, breast using free flap with implantation of prosthesis and expander             |
| 1YM92LAQFG | Excision (modified) radical with reconstruction, breast using distant pedicled flap with implantation of prosthesis and expander |
| 1YM92LATPE | Excision (modified) radical with reconstruction, breast using local flap with implantation of tissue expander                    |
| 1YM92LATPF | Excision (modified) radical with reconstruction, breast using free flap with implantation of tissue expander                     |
| 1YM92LATPG | Excision (modified) radical with reconstruction, breast using distant pedicled flap with implantation of tissue expander         |
| 1YM92LAXXE | Excision (modified) radical with reconstruction, breast using local flap with no implanted device                                |
| 1YM92LAXXF | Excision (modified) radical with reconstruction, breast using free flap with no implanted device                                 |
| 1YM92LAXXG | Excision (modified) radical with reconstruction, breast using distant pedicled flap with no implanted device                     |
| 1YM92TRPME | Excision extended radical with reconstruction, breast using local flap with implantation of breast prosthesis                    |
| 1YM92TRPMF | Excision extended radical with reconstruction, breast using free flap with implantation of breast prosthesis                     |
| 1YM92TRPMG | Excision extended radical with reconstruction, breast using distant pedicled flap with implantation of breast prosthesis         |
| 1YM92TRQFE | Excision extended radical with reconstruction, breast using local flap with implantation of prosthesis and expander              |
| 1YM92TRQFF | Excision extended radical with reconstruction, breast using free flap with implantation of prosthesis and expander               |
| 1YM92TRQFG | Excision extended radical with reconstruction, breast using distant pedicled flap with implantation of prosthesis and expander   |
| 1YM92TRTPE | Excision extended radical with reconstruction, breast using local flap with implantation of tissue expander                      |
| 1YM92TRTPF | Excision extended radical with reconstruction, breast using free flap with implantation of tissue expander                       |
| 1YM92TRTPG | Excision extended radical with reconstruction, breast using distant pedicled flap with implantation of tissue expander           |
| 1YM92TRXXE | Excision extended radical with reconstruction, breast using local flap with no implanted device                                  |
| 1YM92TRXXF | Excision extended radical with reconstruction, breast using free flap with no implanted device                                   |
| 1YM92TRXXG | Excision extended radical with reconstruction, breast using distant pedicled flap with no implanted device                       |

|            |                                                                                                                             |
|------------|-----------------------------------------------------------------------------------------------------------------------------|
| 1YM92WPPME | Excision super radical with reconstruction, breast using local flap with implantation of breast prosthesis                  |
| 1YM92WPPMF | Excision super radical with reconstruction, breast using free flap with implantation of breast prosthesis                   |
| 1YM92WPPMG | Excision super radical with reconstruction, breast using distant pedicled flap with implantation of breast prosthesis       |
| 1YM92WPQFE | Excision super radical with reconstruction, breast using local flap with implantation of prosthesis and expander            |
| 1YM92WPQFF | Excision super radical with reconstruction, breast using free flap with implantation of prosthesis and expander             |
| 1YM92WPQFG | Excision super radical with reconstruction, breast using distant pedicled flap with implantation of prosthesis and expander |
| 1YM92WPTPE | Excision super radical with reconstruction, breast using local flap with implantation of tissue expander                    |
| 1YM92WPTPF | Excision super radical with reconstruction, breast using free flap with implantation of tissue expander                     |
| 1YM92WPTPG | Excision super radical with reconstruction, breast using distant pedicled flap with implantation of tissue expander         |
| 1YM92WPXXE | Excision super radical with reconstruction, breast using local flap with no implanted device                                |
| 1YM92WPXXF | Excision super radical with reconstruction, breast using free flap with no implanted device                                 |
| 1YM92WPXXG | Excision super radical with reconstruction, breast using distant pedicled flap with no implanted device                     |

### Chemotherapy Receipt

- From OHIP databases, look for *the first* chemotherapy within 9 months of the date of diagnosis for all patients
- For patients with a **Surgery Date** (see lumpectomy and mastectomy definitions above), look further for the *first* chemotherapy within 4 months after the surgery.
- OHIP chemotherapy billing fee codes = G281, G339, G345, G359 or G381
  - G281 Inj/inf. each add'l inj. with G381*
  - G339 Inj/inf. chemotherapy & pt assess. single agent I.V.*
  - G345 Inj/inf. chemotherapy & pt assess. multip. Agent I.V.*
  - G359 Inj/inf. chemotherapy & pt assess. sp. single agent etc.*
  - G381 Inj/inf. Chemotherapy (marrow suppress.) single inj.*

### Radiotherapy

- From activity level reporting (ALR) data, look for the first “visit date” of radiotherapy treatment within 9 months of from the date of diagnosis that satisfies the following conditions:
  - o The *”Intent\_of\_radiation\_treatment”* ≠ *”P”* (*Palliative*) **and**
  - o There was a “Dose per Fraction” record greater than zero on that visit date (could be two different records but on the same day)
  - o Restrict the disease sites to breast, chest wall, supraclavicular nodes and axilla

## Mental Health History

OHIP Mental Health Codes used for determining mental health visits to primary care (1,2):

| OHIP Number | Diagnosis                                                                                      |
|-------------|------------------------------------------------------------------------------------------------|
| 295         | Schizophrenia                                                                                  |
| 296         | Manic depressive psychosis, involuntional melancholia                                          |
| 297         | Paranoid states                                                                                |
| 298         | Other psychoses                                                                                |
| 300         | Anxiety neurosis, hysteria, neurasthenia, obsessive compulsive neurosis, reactive depression   |
| 301         | Personality disorders                                                                          |
| 302         | Sexual deviations                                                                              |
| 303         | Alcoholism                                                                                     |
| 304         | Drug dependence, drug addiction                                                                |
| 306         | Psychosomatic disturbances                                                                     |
| 307         | Habit spasms, tics, stuttering, tension headaches, anorexia nervosa, sleep disorders, enuresis |
| 309         | Adjustment reaction                                                                            |
| 311         | Depressive or other non-psychotic disorders, not elsewhere classified                          |
| 897         | Economic problems                                                                              |
| 898         | Marital difficulties                                                                           |
| 899         | Parent-child problems (e.g. child-abuse, battered child, child neglect)                        |
| 900         | Problems with aged parents or in-laws                                                          |
| 901         | Family disruption, divorce                                                                     |
| 902         | Educational problems                                                                           |
| 903         | Illegitimacy                                                                                   |
| 904         | Social maladjustment                                                                           |
| 905         | Occupational problems, unemployment, difficulty at work                                        |
| 906         | Legal problems, litigation, imprisonment                                                       |
| 909         | Other problems of social adjustment                                                            |

(1) Steele LS, Glazier RH, Lin E, Evans M. Using administrative data to measure ambulatory mental health service provision in primary care. *Med Care* 2004 Oct;42(10):960-965.

(2) Ontario Ministry of Health and Long-Term Care. Online Resource Manual for Physicians Section 4. Online Resource Manual for Physicians. 2.0th ed. Ontario; 2015.

Appendix 1B. Data sources used to obtain data elements for variable creation

| <b>Data Source</b>                                                                                             | <b>Data Elements</b>                                                                                                                                        |
|----------------------------------------------------------------------------------------------------------------|-------------------------------------------------------------------------------------------------------------------------------------------------------------|
| Ontario Cancer Registry (OCR)                                                                                  | Date of breast cancer diagnosis, age at diagnosis, sex, other cancer diagnoses, cancer stage                                                                |
| Registered Persons Database (RPDB)                                                                             | Postal code at time of diagnosis, LHIN                                                                                                                      |
| 2006 Statistics Canada Census & Postal code conversion file plus, version 5C                                   | Rurality, Neighborhood income quintile                                                                                                                      |
| Immigration Refugee and Citizenship Canada (IRCC) database                                                     | Immigration status                                                                                                                                          |
| Ontario Health Insurance Plan (OHIP)                                                                           | Number of PCP visits (billed encounters) total and per provider, reasons for visits, diagnostic codes, chemotherapy receipt, start of adjuvant chemotherapy |
| ICES Physician Database                                                                                        | Physician specialty                                                                                                                                         |
| Client Agency Program Enrollment database (CAPE) & Corporate Provider Database                                 | Primary care enrollment model                                                                                                                               |
| Canadian Institute for Health Information: Discharge Abstract Database (DAD) & Same Day Surgery (SDS) database | Diagnosis codes, surgery receipt                                                                                                                            |
| Cancer Activity Level Reporting (ALR) database                                                                 | Date of radiotherapy receipt                                                                                                                                |

Appendix 1C. Relative differences in PCP visit rates– adjusted difference-in-difference model estimates.

|                                         | Exponentiated estimate (95% CI) |
|-----------------------------------------|---------------------------------|
| Intercept                               | 0.01 (0.01-0.01)                |
| Treatment period                        | 2.52 (2.43-2.61)                |
| Mental Health History                   | 1.49 (1.44-1.54)                |
| No Mental Health History                | reference                       |
| Period*Mental Health History            | 0.72 (0.69-0.75)                |
| 0-5 ADGs                                | reference                       |
| 6-9 ADGs                                | 1.82 (1.76-1.88)                |
| 10+ ADGs                                | 2.97 (2.83-3.12)                |
| Period*(6-9 ADGs)                       | 0.57 (0.54-0.59)                |
| Period*(10+ ADGs)                       | 0.46 (0.44-0.49)                |
| Age <40 years                           | 0.94 (0.90-0.99)                |
| Age 40-49 years                         | 0.94 (0.91-0.98)                |
| Age 50-59 years                         | Reference                       |
| Age 60-69 years                         | 1.04 (1.01-1.08)                |
| Age 70-74 years                         | 1.13 (1.07-1.18)                |
| Age >74 years                           | 1.20 (1.11-1.29)                |
| Non-immigrant                           | Reference                       |
| Immigrant                               | 1.03 (1.00-1.07)                |
| Income quintile 1                       | Reference                       |
| Income quintile 2                       | 0.99 (0.95-1.03)                |
| Income quintile 3                       | 0.99 (0.95-1.03)                |
| Income quintile 4                       | 0.97 (0.93-1.01)                |
| Income quintile 5                       | 0.93 (0.89-0.97)                |
| Urban                                   | Reference                       |
| Rural                                   | 0.99 (0.94-1.05)                |
| Rural-remote                            | 0.96 (0.90-1.03)                |
| Rural-very remote                       | 1.20 (1.10-1.31)                |
| LHIN 1 Erie St. Clair                   | 1.06 (0.98-1.14)                |
| LHIN 2 South West                       | 1.11 (1.03-1.19)                |
| LHIN 3 Waterloo Wellington              | 0.97 (0.90-1.05)                |
| LHIN 4 Hamilton Niagara Haldimand Brant | 1.09 (1.02-1.17)                |
| LHIN 5 Central West                     | 1.10 (1.02-1.19)                |
| LHIN 6 Mississauga Halton               | 1.05 (0.97-1.13)                |
| LHIN 7 Toronto Central                  | reference                       |
| LHIN 8 Central                          | 1.05 (0.98-1.12)                |
| LHIN 9 Central East                     | 1.06 (0.99-1.14)                |
| LHIN 10 South East                      | 1.10 (1.01-1.20)                |
| LHIN 11 Champlain                       | 1.12 (1.04-1.21)                |
| LHIN 12 North Simcoe Muskoka            | 1.08 (0.98-1.19)                |
| LHIN 13 North East                      | 1.03 (0.94-1.13)                |
| LHIN 14 North West                      | 1.14 (1.00-1.30)                |
| Continuity 0 visits                     | 0.25 (0.23-0.28)                |
| Continuity 1-2 visits                   | 0.39 (0.38-0.41)                |
| Continuity UPC <=0.75                   | 0.95 (0.93-0.98)                |
| Continuity UPC >0.75                    | Reference                       |
| PC model capitation                     | 0.89 (0.85-0.93)                |
| PC model enhanced FFS                   | 1.00 (0.96-1.04)                |
| PC model team-based capitation          | 0.87 (0.83-0.92)                |
| PC model other                          | 0.74 (0.65-0.83)                |
| PC model straight FFS                   | reference                       |

Total model degrees of freedom = 40

Appendix 1, as supplied by the authors. Appendix to: Walsh RL, Lofters AK, Moineddin R, et al. The effect of comorbidity on primary care use during breast cancer chemotherapy: a population-based retrospective cohort study using CanIMPACT data. *CMAJ Open* 2021.

DOI:10.9778/cmajo.20200166. Copyright © 2021 The Author(s) or their employer(s). To receive this resource in an accessible format, please contact us at [cmajgroup@cmaj.ca](mailto:cmajgroup@cmaj.ca)

Total number of PCP visits = 119,682 visits during 24-month baseline period and 42,944 visits during 6-month treatment period

Total number of people used for model = 12,739

Exposure time = 24 month baseline period + 6 month treatment period. Note: a few participants (n=72) died during the 6 month treatment period and others (n=319) were not OHIP eligible during the full 24-month baseline period. As such, we included an offset term in our negative binomial model to account for differences in the exposure time of the baseline and treatment periods
